# Supplementary material for: Investigating Behaviour and Population Dynamics of Striped Marlin (Kajikia audax) from the Southwest Pacific Ocean with Satellite Tags
Source: PLoS One. 2011 Jun 14;6(6):e21087. doi: 10.1371/journal.pone.0021087 (PMC3114854; doi:10.1371/journal.pone.0021087)
Supplement: Table S1 — Multiplier function K values used as error model parameters used in CTCRW regularization. (XLS) [file pone.0021087.s005.xls]

## Sheet: Table S1
Table S1. Multiplier function K values used as error model parameters used in CTCRW regularization.
Location Quality	Longitude	Latitude
3*	1	1
2*	1.5	1.5
1*	4	4
0*	14	14
A*	5.21	11.08
B*	20.78	31.03
uKFSST archival**	30	40
uKFSST transmitted**	30	60
GPS***	0	0
* Values are from crawl package documentation.
** Produced the smallest mean deviation from Argos positions available within 24 hours.
*** GPS locations are assumed to be very near zero relative to LC 3.
